# Supplementary material
Source: HighWire-hosted journal article supplement (https://bmjopen.bmj.com/content/10/4/e032511)
Supplement: inline-supplementary-material-1 [file inline-supplementary-material-1.pdf]

Ethical approvals over lifetime of ECRHS 3

Committee name and approval number

| Genetics | Centre Name & Country                   | ECRHS 3                                                                                                                                          |
|----------|-----------------------------------------|--------------------------------------------------------------------------------------------------------------------------------------------------|
| N        | Australia, Melbourne                    | Monash University Human Research Ethics Committee Project # CF11/1818-2010001012                                                                 |
| N        | Belgium, South Antwerp and Antwerp City | Comité voor Medische Ethiek UZA/UA 11/41/288 – UA                                                                                                |
| N        | Denmark, Aarhus                         | De Videnskabsetiske Komiteer for region Midtjylland.<br>M-20110106                                                                               |
| Y        | Estonia, Tartu                          | Research Ethics Committee of the University of Tartu (UT REC) 209T-17 and 225/M-24                                                               |
| N        | France, Paris                           | Etude ECRHS III: promotion CHU de Grenoble.<br>Ethical approval CPP Sud est V 4 mars 2011.<br>Approval Ministry of Health AFSSAPS n°B110053-70.  |
| Y        | France, Grenoble                        | Etude ECRHS III: promotion CHU de Grenoble.<br>Ethical approval CPP Sud est V 4 mars 2011.<br>Approval Ministry of Health AFSSAPS n°B110053-70.  |
| N        | France, Montpellier                     | Etude ECRHS III : promotion CHU de Grenoble.<br>Ethical approval CPP Sud est V 4 mars 2011.<br>Approval Ministry of Health AFSSAPS n°B110053-70. |

|   |                    |                                                                                                                                                                          |
|---|--------------------|--------------------------------------------------------------------------------------------------------------------------------------------------------------------------|
|   |                    |                                                                                                                                                                          |
| N | France, Bordeaux   | - Etude ECRHS III : promotion CHU de Grenoble.<br>Ethical approval CPP Sud est V 4 mars 2011.<br>Approval Ministry of Health AFSSAPS<br>n°B110053-70.                    |
| Y | Germany, Hamburg   | Ethikkommission der Bayerischen<br>Landesärztekammer (Positive Votum: 10015                                                                                              |
| Y | Germany, Erfurt    | Ethikkommission der Bayerischen<br>Landesärztekammer (Positive Votum: 10015                                                                                              |
| N | Iceland, Reykjavik | National Bioethics committee of Iceland VSN-<br>11-121-S3                                                                                                                |
| Y | Norway, Bergen     | Regional Ethics Committee West Norway<br>2010/759                                                                                                                        |
|   | Barcelona, Spain   | Ethics Committee of the Parc de Salut Mar,<br>Barcelona (Comité del etico d'investigacion<br>clínica (CEIC)- Parc de Salut Mar, Barcelona ( Approval number) 2009/3500/1 |
| Y | Spain, Galdakao    | Ethics Committee of the Parc de Salut Mar,<br>Barcelona (Comité etic d'investigacio clínica<br>(CEIC)- Parc de Salut Mar, Barcelona ( Approval<br>num) 2009/3500/1       |
| Y | Spain, Albacete    | Ethics Committee of the Parc de Salut Mar,<br>Barcelona (Comité etic d'investigacio clínica<br>(CEIC)- Parc de Salut Mar, Barcelona ( Approval<br>number) 2009/3500/1    |

|   |                    |                                                                                                                                                                    |
|---|--------------------|--------------------------------------------------------------------------------------------------------------------------------------------------------------------|
| Y | Oviedo, Spain      | Ethics Committee of the Parc de Salut Mar, Barcelona (Comité del etico d'investigacion clínica (CEIC)- Parc de Salut Mar, Barcelona ( Approval number) 2009/3500/1 |
| Y | Huelva, Spain      | Ethics Committee of the Parc de Salut Mar, Barcelona (Comité del etico d'investigacion clínica (CEIC)- Parc de Salut Mar, Barcelona ( Approval number) 2009/3500/1 |
| Y | Basle, Switzerland | Swiss Academy of Sciences-Number not available                                                                                                                     |
| N | Gothenburg, Sweden | Regional Ethical Review Board in Uppsala. 2010/432                                                                                                                 |
| Y | Uppsala, Sweden    | Regional Ethical Review Board in Uppsala. And the number of the decision is 2010/432                                                                               |
| Y | Umea               | Regional Ethical Review Board in Uppsala. 2010/432                                                                                                                 |
| Y | Ipswich, UK        | NRES committee London-Stanmore REC Ref: 11/LO/0965                                                                                                                 |
| Y | Norwich, UK        | NRES committee London-Stanmore REC Ref: 11/LO/0965                                                                                                                 |
| N | Caerphilly, UK     | NRES committee London-Stanmore REC Ref: 11/LO/0965                                                                                                                 |
